# Supplementary material
Source: publisher figshare collection journal article supplement (https://acs.figshare.com/ndownloader/files/4278976)
Supplement: Supplementary file 1 [file 4278976]

## Supporting Information

### Molecular Layer-by-Layer Self-Assembly and Mercury Sensing Characteristics of Novel Brush Polymers Bearing Thymine Moieties

Jungwoon Jung<sup>†,1</sup>, Jin Chul Kim<sup>†,1</sup>, Yecheol Rho<sup>†,1</sup>, Mihee Kim<sup>1</sup>, Wonsang Kwon<sup>1</sup>, Heesoo Kim<sup>\*,2</sup>, and Moonhor Ree<sup>\*,1</sup>

<sup>1</sup>Department of Chemistry, Division of Advanced Materials Science, Center for Electro-Photo Behaviors in Advanced Molecular Systems, Polymer Research Institute, and BK School of Molecular Science, Pohang University of Science and Technology, Pohang 790-784, Republic of Korea; <sup>2</sup>Department of Microbiology and Dongguk Medical Institute, Dongguk University College of Medicine, Gyeongju 780-714, Republic of Korea

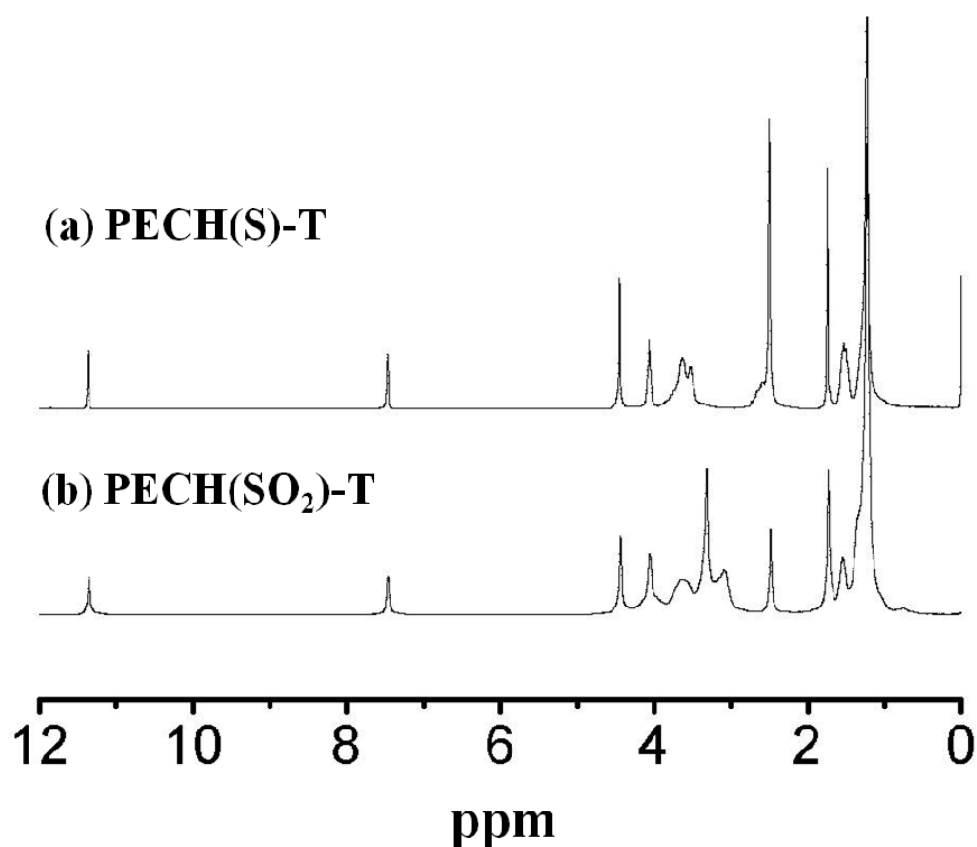

**Figure S1.** <sup>1</sup>H NMR spectra of the brush polymers measured in DMSO-*d*<sub>6</sub>.

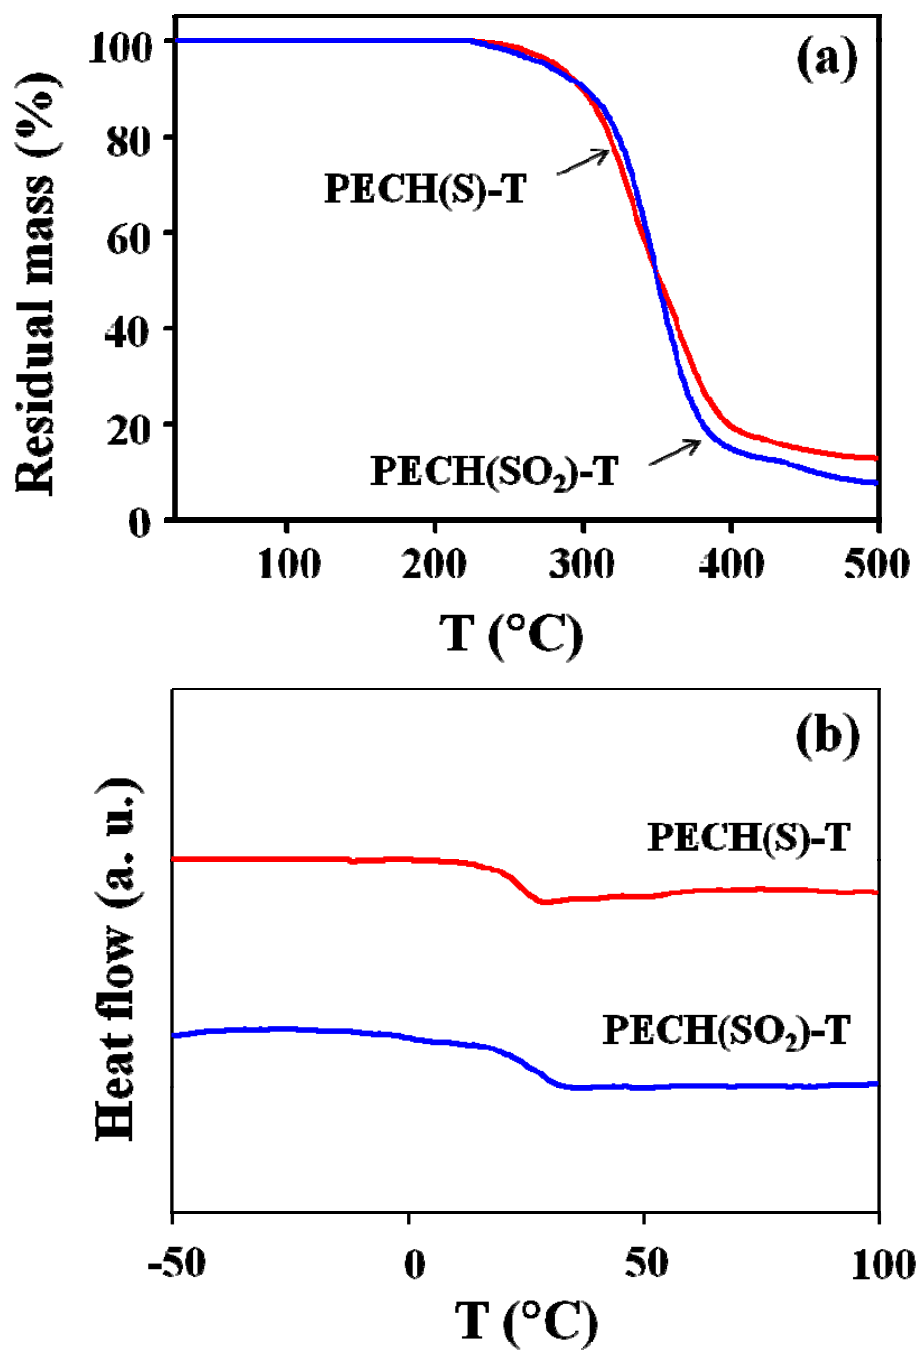

**Figure S2.** (a) TGA and (b) DSC thermograms of the brush polymers, which were measured at a heating rate of 10.0 °C/min under a nitrogen atmosphere.

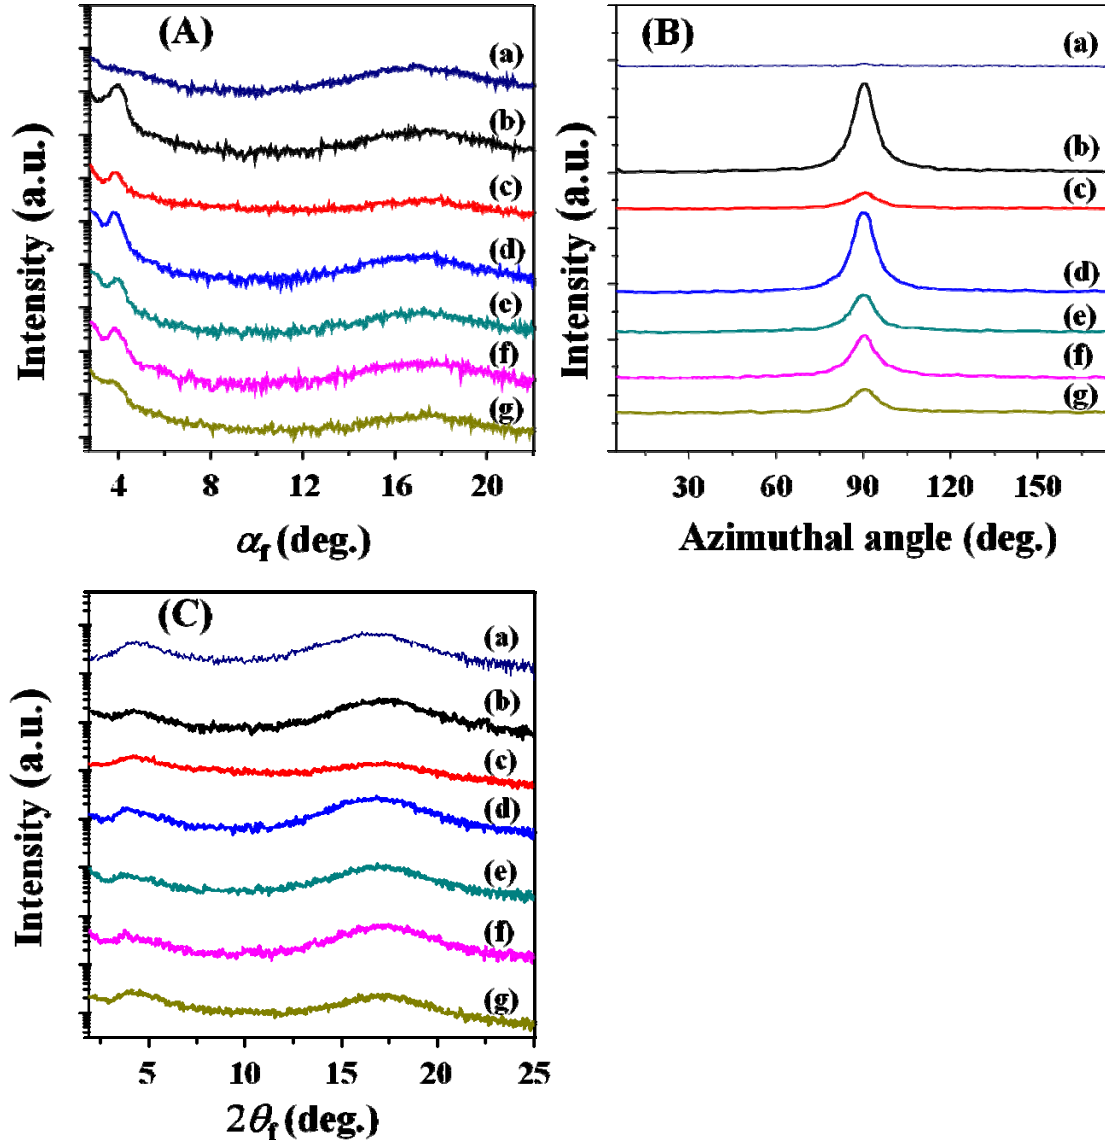

**Figure S3.** Scattering profiles extracted from the GIXS patterns of PECH(S)-T films in Figure 2: (A) out-of-plane scattering profiles extracted along the  $\alpha_f$  direction at  $2\theta_f = 0^\circ$ ; (B) azimuthal angle profiles of the scattering peak in the low angle region; (C) in-plane scattering profiles extracted along the  $2\theta_f$  direction at  $\alpha_f = 0^\circ$ . The films were in (a) dry condition and treated with (b) water, (c)  $\text{Hg}^{2+}$  ion (d)  $\text{Zn}^{2+}$  ion (e)  $\text{Cu}^{2+}$  ion (f)  $\text{Fe}^{2+}$  ion and (g)  $\text{Ag}^+$  ion solution.

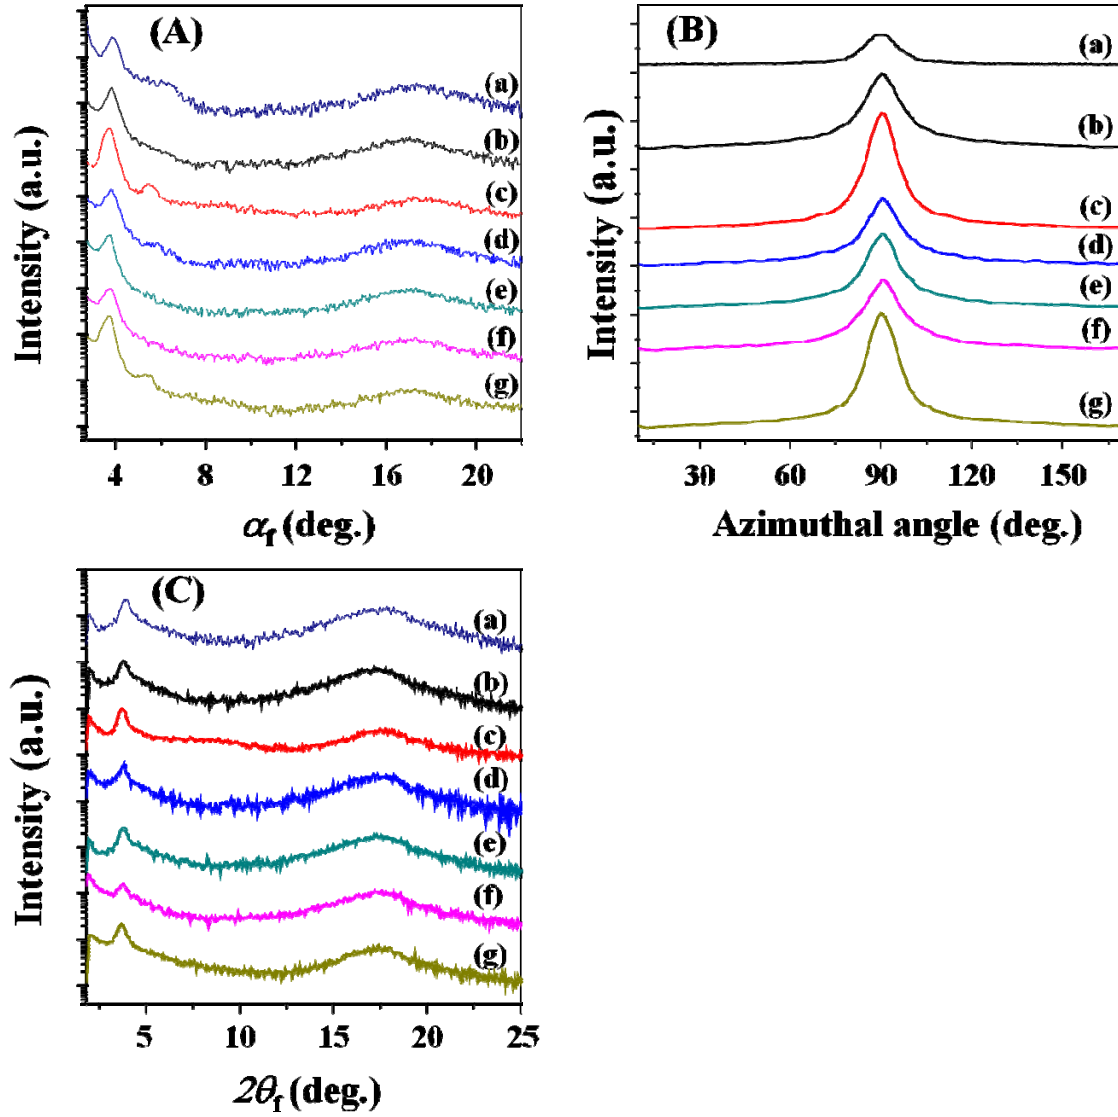

**Figure S4.** Scattering profiles extracted from the GIXS patterns of PECH(SO<sub>2</sub>)-T films in Figure 3: (A) out-of-plane scattering profiles extracted along the  $\alpha_f$  direction at  $2\theta_f = 0^\circ$ ; (B) azimuthal angle profiles of the scattering peak in the low angle region; (C) in-plane scattering profiles extracted along the  $2\theta_f$  direction at  $\alpha_f = 0^\circ$ . The films were in (a) dry condition and treated with (b) water, (c)  $\text{Hg}^{2+}$  ion (d)  $\text{Zn}^{2+}$  ion (e)  $\text{Cu}^{2+}$  ion (f)  $\text{Fe}^{2+}$  ion and (g)  $\text{Ag}^{+}$  ion solution.
